# Supplementary material for: Physical activity is associated with a lower risk of contracting and dying in infection and sepsis: a Swedish population-based cohort study
Source: PubMed Central journal article supplement (PMC10962192; doi:10.1186/s13054-024-04881-8), 2024-03-24

## Contracting

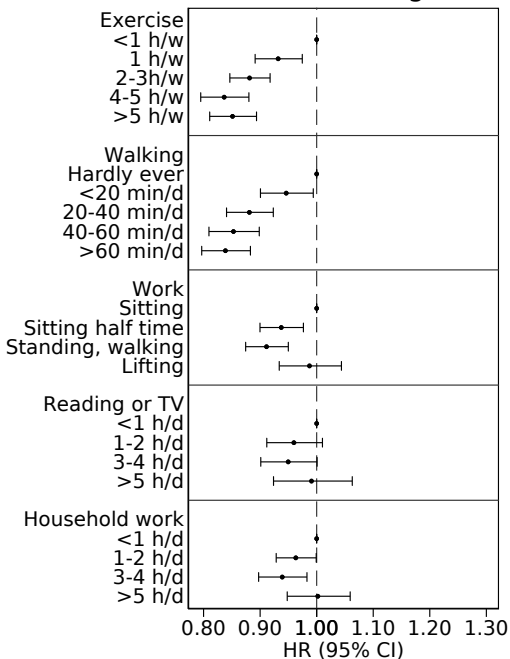

## Dying

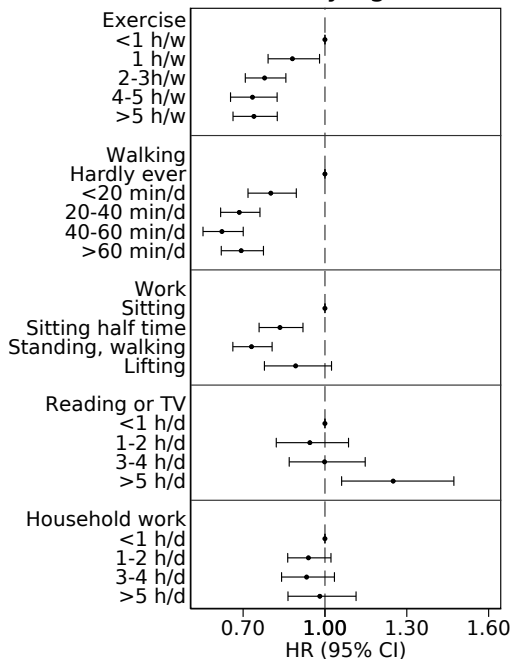

Supplement: 13054_2024_4881_MOESM9_ESM.pdf [file 13054_2024_4881_MOESM9_ESM.pdf]
