# Supplementary material for: Physical activity is associated with a lower risk of contracting and dying in infection and sepsis: a Swedish population-based cohort study
Source: PubMed Central journal article supplement (PMC10962192; doi:10.1186/s13054-024-04881-8), 2024-03-24
Supplement: 13054_2024_4881_MOESM10_ESM.pdf [file 13054_2024_4881_MOESM10_ESM.pdf]

# Other sepsis

## Contracting

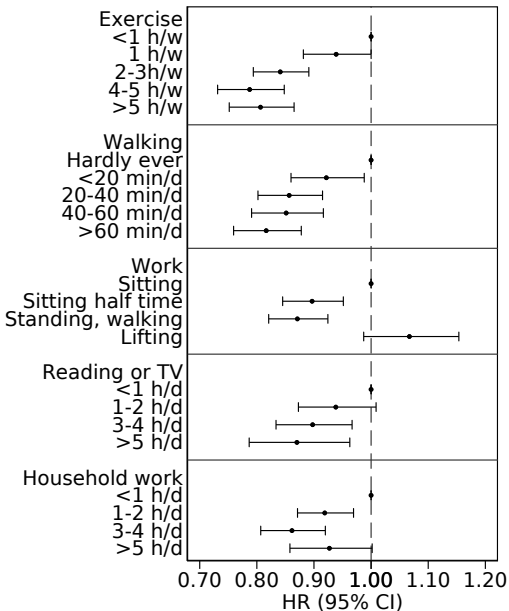

## Dying

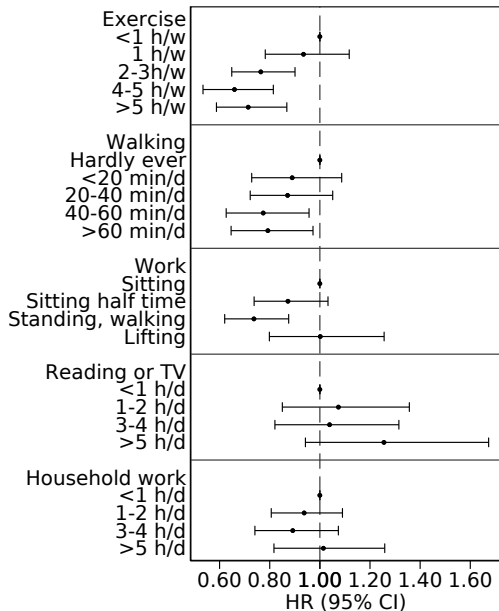

# Abdominal

## Contracting

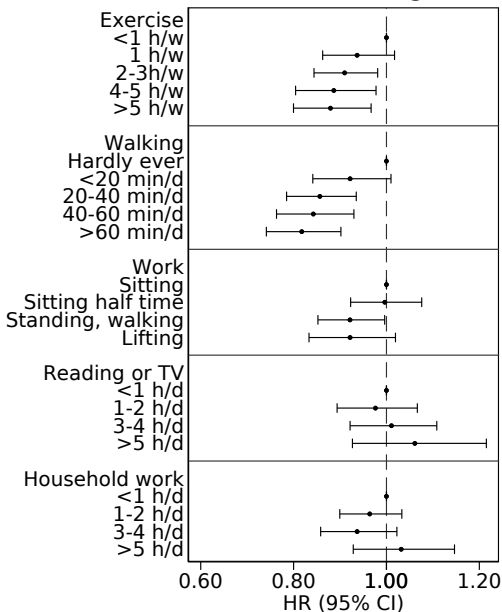

## Dying

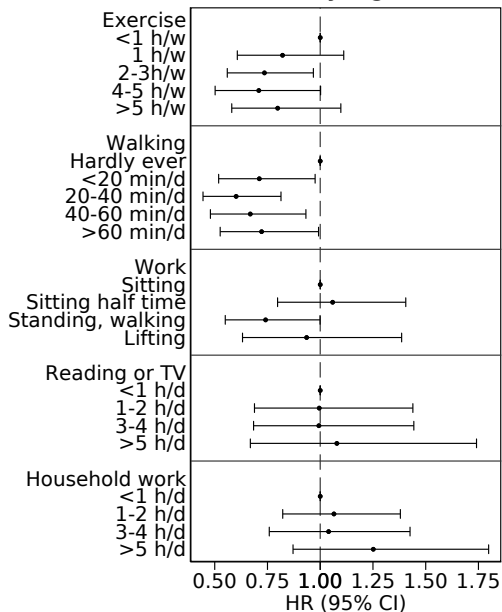

# Urogenital

## Contracting

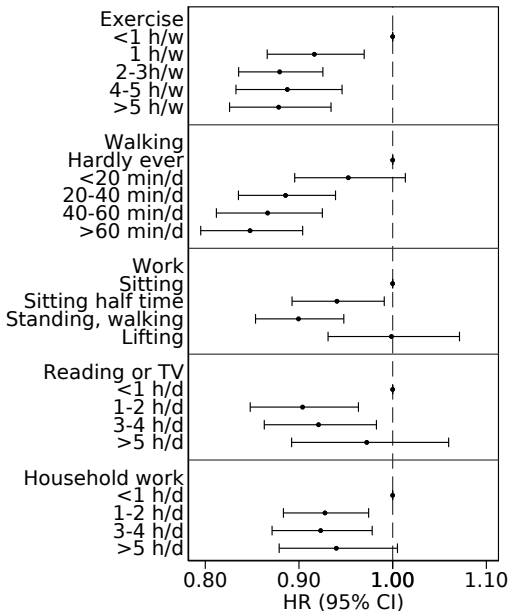

## Dying

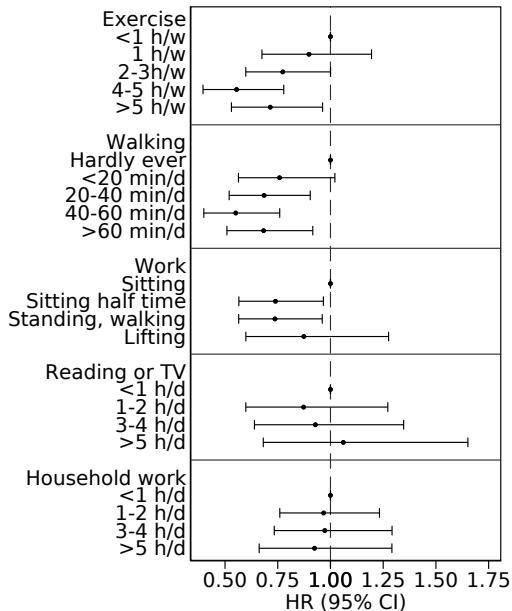

# Soft tissue

## Contracting

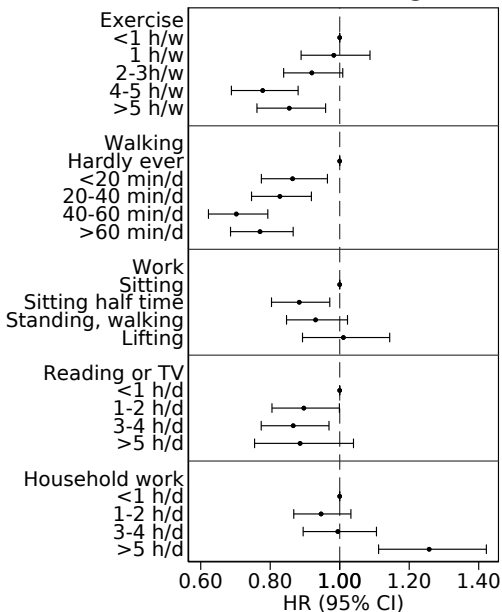

## Dying

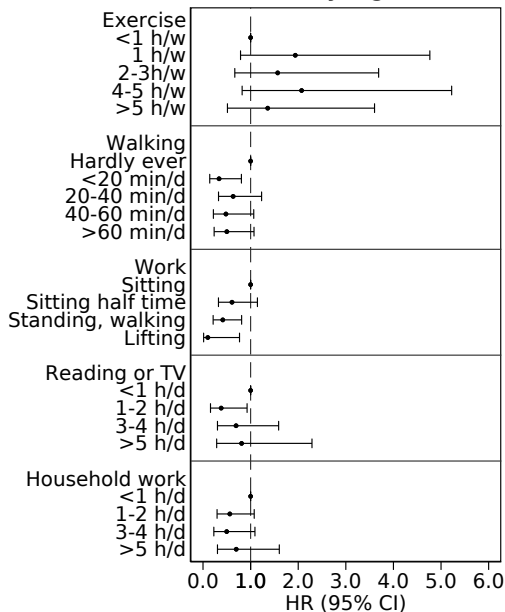

# Pneumonia

## Contracting

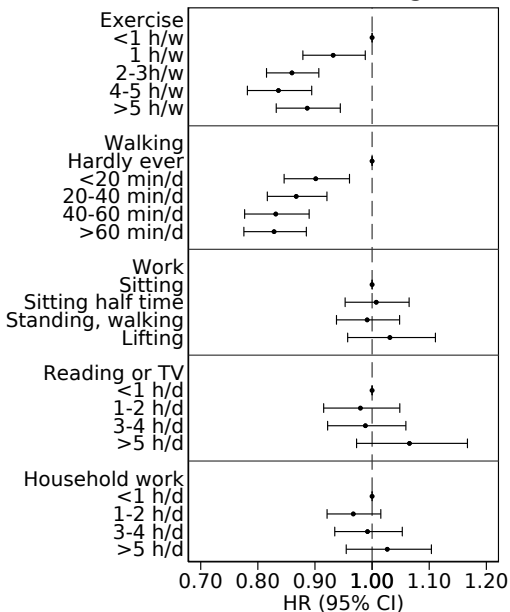

## Dying

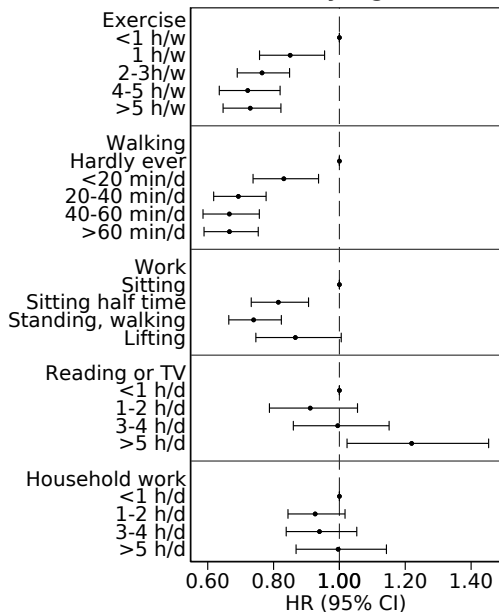

# Endocarditis

Contracting

Dying

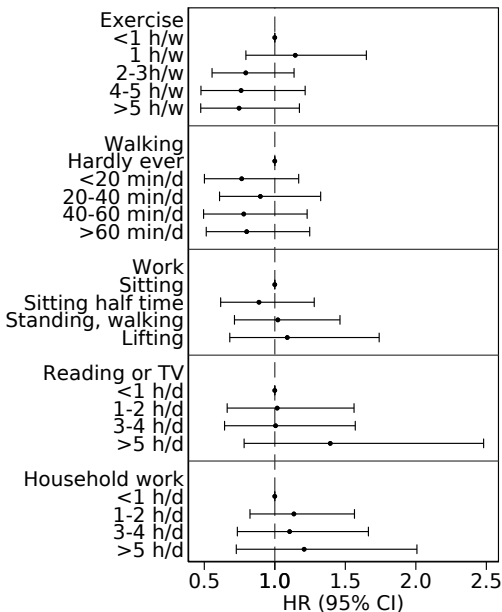

Too few deaths for analysis (n=27)

# Tuberculosis

## Contracting

## Dying

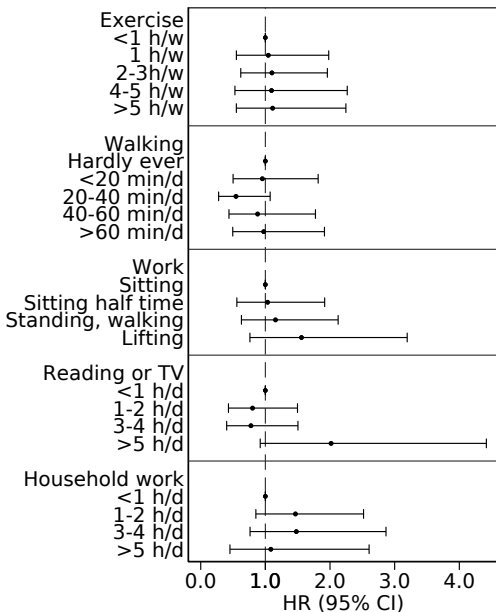

Too few deaths for analysis (n=9)

# Central nervous system

Contracting

Dying

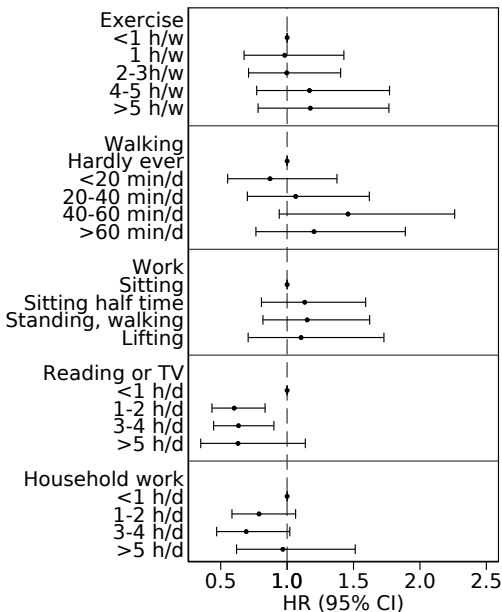

Too few deaths for analysis (n=18)
